# Supplementary material for: Instant Coffee Is Negatively Associated with Telomere Length: Finding from Observational and Mendelian Randomization Analyses of UK Biobank
Source: MDPI journal article supplement (doi:10.3390/nu15061354), 2023-03-10
Supplement: s1 [file s1]

## **Contents**

**Supplementary Table S1.** The leave-one-out analysis of coffee intake on telomere length using IVW approach.

**Supplementary Table S2.** The leave-one-out analysis of filtered coffee intake on telomere length using IVW approach.

**Supplementary Table S3.** The leave-one-out analysis of instant coffee intake on telomere length using IVW approach.

**Supplementary Table S1.** The leave-one-out analysis of coffee intake on telomere length using IVW approach.

| Exposure      | Outcome         | GWAS ID of exposure | GWAS ID of outcome | Sample size | SNP         | $\beta$  | se       | $p$      |
|---------------|-----------------|---------------------|--------------------|-------------|-------------|----------|----------|----------|
| Coffee intake | telomere length | ukb-b-5237          | ieu-b-4879         | 472174      | rs10053913  | -0.02387 | 0.037899 | 0.528737 |
| Coffee intake | telomere length | ukb-b-5237          | ieu-b-4879         | 472174      | rs10193706  | -0.02242 | 0.03787  | 0.553889 |
| Coffee intake | telomere length | ukb-b-5237          | ieu-b-4879         | 472174      | rs10500356  | -0.02254 | 0.037867 | 0.55165  |
| Coffee intake | telomere length | ukb-b-5237          | ieu-b-4879         | 472174      | rs1057868   | -0.03433 | 0.037835 | 0.364252 |
| Coffee intake | telomere length | ukb-b-5237          | ieu-b-4879         | 472174      | rs10938398  | -0.02436 | 0.037873 | 0.52004  |
| Coffee intake | telomere length | ukb-b-5237          | ieu-b-4879         | 472174      | rs10992783  | -0.01977 | 0.037499 | 0.598092 |
| Coffee intake | telomere length | ukb-b-5237          | ieu-b-4879         | 472174      | rs11032480  | -0.022   | 0.037829 | 0.560812 |
| Coffee intake | telomere length | ukb-b-5237          | ieu-b-4879         | 472174      | rs11236225  | -0.0222  | 0.037858 | 0.55762  |
| Coffee intake | telomere length | ukb-b-5237          | ieu-b-4879         | 472174      | rs11678584  | -0.02351 | 0.037918 | 0.535213 |
| Coffee intake | telomere length | ukb-b-5237          | ieu-b-4879         | 472174      | rs116814395 | -0.02461 | 0.037859 | 0.515708 |
| Coffee intake | telomere length | ukb-b-5237          | ieu-b-4879         | 472174      | rs117514553 | -0.0238  | 0.037887 | 0.52986  |
| Coffee intake | telomere length | ukb-b-5237          | ieu-b-4879         | 472174      | rs117810762 | -0.02337 | 0.037934 | 0.537866 |
| Coffee intake | telomere length | ukb-b-5237          | ieu-b-4879         | 472174      | rs117968677 | -0.02526 | 0.037879 | 0.504802 |
| Coffee intake | telomere length | ukb-b-5237          | ieu-b-4879         | 472174      | rs1182580   | -0.02326 | 0.037895 | 0.539292 |

| Exposure      | Outcome         | GWAS ID of exposure | GWAS ID of outcome | Sample size | SNP         | $\beta$  | se       | <i>p</i> |
|---------------|-----------------|---------------------|--------------------|-------------|-------------|----------|----------|----------|
| Coffee intake | telomere length | ukb-b-5237          | ieu-b-4879         | 472174      | rs12514566  | -0.0265  | 0.037889 | 0.484369 |
| Coffee intake | telomere length | ukb-b-5237          | ieu-b-4879         | 472174      | rs12604773  | -0.02756 | 0.037571 | 0.463226 |
| Coffee intake | telomere length | ukb-b-5237          | ieu-b-4879         | 472174      | rs12649199  | -0.02362 | 0.03789  | 0.533072 |
| Coffee intake | telomere length | ukb-b-5237          | ieu-b-4879         | 472174      | rs12930957  | -0.02326 | 0.037895 | 0.539349 |
| Coffee intake | telomere length | ukb-b-5237          | ieu-b-4879         | 472174      | rs12989746  | -0.02407 | 0.037926 | 0.525623 |
| Coffee intake | telomere length | ukb-b-5237          | ieu-b-4879         | 472174      | rs13054099  | -0.03114 | 0.037018 | 0.400219 |
| Coffee intake | telomere length | ukb-b-5237          | ieu-b-4879         | 472174      | rs13096450  | -0.02304 | 0.037887 | 0.543124 |
| Coffee intake | telomere length | ukb-b-5237          | ieu-b-4879         | 472174      | rs13163336  | -0.02298 | 0.037993 | 0.545282 |
| Coffee intake | telomere length | ukb-b-5237          | ieu-b-4879         | 472174      | rs13378240  | -0.02118 | 0.03776  | 0.574894 |
| Coffee intake | telomere length | ukb-b-5237          | ieu-b-4879         | 472174      | rs13378244  | -0.02435 | 0.037883 | 0.520306 |
| Coffee intake | telomere length | ukb-b-5237          | ieu-b-4879         | 472174      | rs1338549   | -0.02468 | 0.037923 | 0.515132 |
| Coffee intake | telomere length | ukb-b-5237          | ieu-b-4879         | 472174      | rs13387939  | -0.02237 | 0.038036 | 0.556512 |
| Coffee intake | telomere length | ukb-b-5237          | ieu-b-4879         | 472174      | rs13437947  | -0.0241  | 0.037884 | 0.52467  |
| Coffee intake | telomere length | ukb-b-5237          | ieu-b-4879         | 472174      | rs1421085   | -0.01712 | 0.038152 | 0.653532 |
| Coffee intake | telomere length | ukb-b-5237          | ieu-b-4879         | 472174      | rs144620429 | -0.02547 | 0.037805 | 0.500548 |

| Exposure      | Outcome         | GWAS ID of exposure | GWAS ID of outcome | Sample size | SNP        | $\beta$  | se       | <i>p</i> |
|---------------|-----------------|---------------------|--------------------|-------------|------------|----------|----------|----------|
| Coffee intake | telomere length | ukb-b-5237          | ieu-b-4879         | 472174      | rs1447365  | -0.02411 | 0.037891 | 0.524627 |
| Coffee intake | telomere length | ukb-b-5237          | ieu-b-4879         | 472174      | rs1527961  | -0.02562 | 0.037869 | 0.498706 |
| Coffee intake | telomere length | ukb-b-5237          | ieu-b-4879         | 472174      | rs16930598 | -0.02294 | 0.037883 | 0.544751 |
| Coffee intake | telomere length | ukb-b-5237          | ieu-b-4879         | 472174      | rs17144566 | -0.02223 | 0.037884 | 0.557347 |
| Coffee intake | telomere length | ukb-b-5237          | ieu-b-4879         | 472174      | rs17842490 | -0.016   | 0.037392 | 0.66878  |
| Coffee intake | telomere length | ukb-b-5237          | ieu-b-4879         | 472174      | rs1942965  | -0.02268 | 0.037907 | 0.549724 |
| Coffee intake | telomere length | ukb-b-5237          | ieu-b-4879         | 472174      | rs2126069  | -0.02338 | 0.037921 | 0.537575 |
| Coffee intake | telomere length | ukb-b-5237          | ieu-b-4879         | 472174      | rs2189234  | -0.02262 | 0.037935 | 0.551003 |
| Coffee intake | telomere length | ukb-b-5237          | ieu-b-4879         | 472174      | rs2231142  | -0.02867 | 0.037319 | 0.442265 |
| Coffee intake | telomere length | ukb-b-5237          | ieu-b-4879         | 472174      | rs2350804  | -0.02264 | 0.037874 | 0.549908 |
| Coffee intake | telomere length | ukb-b-5237          | ieu-b-4879         | 472174      | rs2373834  | -0.0242  | 0.037878 | 0.522904 |
| Coffee intake | telomere length | ukb-b-5237          | ieu-b-4879         | 472174      | rs2400677  | -0.02555 | 0.037828 | 0.49944  |
| Coffee intake | telomere length | ukb-b-5237          | ieu-b-4879         | 472174      | rs2465037  | -0.02325 | 0.037957 | 0.540117 |
| Coffee intake | telomere length | ukb-b-5237          | ieu-b-4879         | 472174      | rs2472297  | -0.0061  | 0.040439 | 0.880191 |
| Coffee intake | telomere length | ukb-b-5237          | ieu-b-4879         | 472174      | rs2521501  | -0.02294 | 0.037907 | 0.544999 |

| Exposure      | Outcome         | GWAS ID of exposure | GWAS ID of outcome | Sample size | SNP        | $\beta$  | se       | p        |
|---------------|-----------------|---------------------|--------------------|-------------|------------|----------|----------|----------|
| Coffee intake | telomere length | ukb-b-5237          | ieu-b-4879         | 472174      | rs2577374  | -0.02331 | 0.037912 | 0.538611 |
| Coffee intake | telomere length | ukb-b-5237          | ieu-b-4879         | 472174      | rs2595223  | -0.02703 | 0.037638 | 0.472674 |
| Coffee intake | telomere length | ukb-b-5237          | ieu-b-4879         | 472174      | rs2597805  | -0.02445 | 0.03792  | 0.519067 |
| Coffee intake | telomere length | ukb-b-5237          | ieu-b-4879         | 472174      | rs2842183  | -0.02703 | 0.037639 | 0.472624 |
| Coffee intake | telomere length | ukb-b-5237          | ieu-b-4879         | 472174      | rs28490963 | -0.02312 | 0.037892 | 0.541683 |
| Coffee intake | telomere length | ukb-b-5237          | ieu-b-4879         | 472174      | rs329122   | -0.01688 | 0.03703  | 0.648574 |
| Coffee intake | telomere length | ukb-b-5237          | ieu-b-4879         | 472174      | rs34060476 | -0.02049 | 0.037961 | 0.589362 |
| Coffee intake | telomere length | ukb-b-5237          | ieu-b-4879         | 472174      | rs34276507 | -0.02497 | 0.037841 | 0.509311 |
| Coffee intake | telomere length | ukb-b-5237          | ieu-b-4879         | 472174      | rs35303290 | -0.02207 | 0.037853 | 0.559863 |
| Coffee intake | telomere length | ukb-b-5237          | ieu-b-4879         | 472174      | rs4410790  | -0.02887 | 0.040321 | 0.474023 |
| Coffee intake | telomere length | ukb-b-5237          | ieu-b-4879         | 472174      | rs442355   | -0.02456 | 0.037939 | 0.517415 |
| Coffee intake | telomere length | ukb-b-5237          | ieu-b-4879         | 472174      | rs4615895  | -0.02239 | 0.037961 | 0.555321 |
| Coffee intake | telomere length | ukb-b-5237          | ieu-b-4879         | 472174      | rs476828   | -0.02233 | 0.038149 | 0.558269 |
| Coffee intake | telomere length | ukb-b-5237          | ieu-b-4879         | 472174      | rs4836963  | -0.02445 | 0.037873 | 0.518573 |
| Coffee intake | telomere length | ukb-b-5237          | ieu-b-4879         | 472174      | rs4840338  | -0.02451 | 0.037869 | 0.517413 |

| Exposure      | Outcome         | GWAS ID of exposure | GWAS ID of outcome | Sample size | SNP        | $\beta$  | se       | $p$      |
|---------------|-----------------|---------------------|--------------------|-------------|------------|----------|----------|----------|
| Coffee intake | telomere length | ukb-b-5237          | ieu-b-4879         | 472174      | rs4937720  | -0.02132 | 0.037743 | 0.572145 |
| Coffee intake | telomere length | ukb-b-5237          | ieu-b-4879         | 472174      | rs4938000  | -0.02528 | 0.037835 | 0.503955 |
| Coffee intake | telomere length | ukb-b-5237          | ieu-b-4879         | 472174      | rs4970968  | -0.02325 | 0.03789  | 0.539533 |
| Coffee intake | telomere length | ukb-b-5237          | ieu-b-4879         | 472174      | rs4984636  | -0.02436 | 0.037876 | 0.520042 |
| Coffee intake | telomere length | ukb-b-5237          | ieu-b-4879         | 472174      | rs516636   | -0.02181 | 0.037888 | 0.56493  |
| Coffee intake | telomere length | ukb-b-5237          | ieu-b-4879         | 472174      | rs55716899 | -0.02464 | 0.037872 | 0.51536  |
| Coffee intake | telomere length | ukb-b-5237          | ieu-b-4879         | 472174      | rs55780162 | -0.02335 | 0.037889 | 0.537762 |
| Coffee intake | telomere length | ukb-b-5237          | ieu-b-4879         | 472174      | rs55895231 | -0.02404 | 0.037882 | 0.525634 |
| Coffee intake | telomere length | ukb-b-5237          | ieu-b-4879         | 472174      | rs56113850 | -0.02765 | 0.037909 | 0.465827 |
| Coffee intake | telomere length | ukb-b-5237          | ieu-b-4879         | 472174      | rs56212739 | -0.02082 | 0.03771  | 0.580875 |
| Coffee intake | telomere length | ukb-b-5237          | ieu-b-4879         | 472174      | rs56349356 | -0.02304 | 0.037873 | 0.542939 |
| Coffee intake | telomere length | ukb-b-5237          | ieu-b-4879         | 472174      | rs56791931 | -0.0231  | 0.037892 | 0.542172 |
| Coffee intake | telomere length | ukb-b-5237          | ieu-b-4879         | 472174      | rs6030315  | -0.0426  | 0.027412 | 0.120185 |
| Coffee intake | telomere length | ukb-b-5237          | ieu-b-4879         | 472174      | rs6062682  | -0.02306 | 0.037962 | 0.543542 |
| Coffee intake | telomere length | ukb-b-5237          | ieu-b-4879         | 472174      | rs6063085  | -0.02017 | 0.037784 | 0.59354  |

| Exposure      | Outcome         | GWAS ID of exposure | GWAS ID of outcome | Sample size | SNP        | $\beta$  | se       | <i>p</i> |
|---------------|-----------------|---------------------|--------------------|-------------|------------|----------|----------|----------|
| Coffee intake | telomere length | ukb-b-5237          | ieu-b-4879         | 472174      | rs61928609 | -0.02651 | 0.037897 | 0.484279 |
| Coffee intake | telomere length | ukb-b-5237          | ieu-b-4879         | 472174      | rs62064918 | -0.0253  | 0.037875 | 0.504156 |
| Coffee intake | telomere length | ukb-b-5237          | ieu-b-4879         | 472174      | rs62121718 | -0.02394 | 0.03789  | 0.527557 |
| Coffee intake | telomere length | ukb-b-5237          | ieu-b-4879         | 472174      | rs630194   | -0.0253  | 0.037951 | 0.504942 |
| Coffee intake | telomere length | ukb-b-5237          | ieu-b-4879         | 472174      | rs641727   | -0.02252 | 0.037895 | 0.552393 |
| Coffee intake | telomere length | ukb-b-5237          | ieu-b-4879         | 472174      | rs6469262  | -0.02453 | 0.037916 | 0.517718 |
| Coffee intake | telomere length | ukb-b-5237          | ieu-b-4879         | 472174      | rs6544966  | -0.02325 | 0.037891 | 0.539542 |
| Coffee intake | telomere length | ukb-b-5237          | ieu-b-4879         | 472174      | rs6691876  | -0.02088 | 0.037771 | 0.580463 |
| Coffee intake | telomere length | ukb-b-5237          | ieu-b-4879         | 472174      | rs6937318  | -0.01932 | 0.037538 | 0.606766 |
| Coffee intake | telomere length | ukb-b-5237          | ieu-b-4879         | 472174      | rs6989976  | -0.02388 | 0.037894 | 0.528494 |
| Coffee intake | telomere length | ukb-b-5237          | ieu-b-4879         | 472174      | rs71429826 | -0.02504 | 0.037837 | 0.508154 |
| Coffee intake | telomere length | ukb-b-5237          | ieu-b-4879         | 472174      | rs723145   | -0.02368 | 0.037899 | 0.532055 |
| Coffee intake | telomere length | ukb-b-5237          | ieu-b-4879         | 472174      | rs730632   | -0.02127 | 0.037774 | 0.57339  |
| Coffee intake | telomere length | ukb-b-5237          | ieu-b-4879         | 472174      | rs73075167 | -0.02036 | 0.03784  | 0.59049  |
| Coffee intake | telomere length | ukb-b-5237          | ieu-b-4879         | 472174      | rs73123665 | -0.02418 | 0.037882 | 0.52326  |

| Exposure      | Outcome         | GWAS ID of exposure | GWAS ID of outcome | Sample size | SNP        | $\beta$  | se       | <i>p</i> |
|---------------|-----------------|---------------------|--------------------|-------------|------------|----------|----------|----------|
| Coffee intake | telomere length | ukb-b-5237          | ieu-b-4879         | 472174      | rs73228435 | -0.02358 | 0.037908 | 0.533928 |
| Coffee intake | telomere length | ukb-b-5237          | ieu-b-4879         | 472174      | rs75347775 | -0.0235  | 0.037928 | 0.535536 |
| Coffee intake | telomere length | ukb-b-5237          | ieu-b-4879         | 472174      | rs7585210  | -0.02532 | 0.037814 | 0.503187 |
| Coffee intake | telomere length | ukb-b-5237          | ieu-b-4879         | 472174      | rs763030   | -0.02846 | 0.037401 | 0.446651 |
| Coffee intake | telomere length | ukb-b-5237          | ieu-b-4879         | 472174      | rs76852278 | -0.02273 | 0.037884 | 0.54858  |
| Coffee intake | telomere length | ukb-b-5237          | ieu-b-4879         | 472174      | rs76881016 | -0.02482 | 0.037878 | 0.512224 |
| Coffee intake | telomere length | ukb-b-5237          | ieu-b-4879         | 472174      | rs77350503 | -0.02224 | 0.037832 | 0.556646 |
| Coffee intake | telomere length | ukb-b-5237          | ieu-b-4879         | 472174      | rs7743687  | -0.02379 | 0.037899 | 0.530178 |
| Coffee intake | telomere length | ukb-b-5237          | ieu-b-4879         | 472174      | rs780093   | -0.01688 | 0.037671 | 0.654104 |
| Coffee intake | telomere length | ukb-b-5237          | ieu-b-4879         | 472174      | rs7811609  | -0.02648 | 0.037773 | 0.48324  |
| Coffee intake | telomere length | ukb-b-5237          | ieu-b-4879         | 472174      | rs78267637 | -0.02383 | 0.037939 | 0.529942 |
| Coffee intake | telomere length | ukb-b-5237          | ieu-b-4879         | 472174      | rs78308709 | -0.02461 | 0.037886 | 0.516016 |
| Coffee intake | telomere length | ukb-b-5237          | ieu-b-4879         | 472174      | rs7989746  | -0.02496 | 0.037842 | 0.50945  |
| Coffee intake | telomere length | ukb-b-5237          | ieu-b-4879         | 472174      | rs8056750  | -0.02552 | 0.037896 | 0.500737 |
| Coffee intake | telomere length | ukb-b-5237          | ieu-b-4879         | 472174      | rs8068193  | -0.02189 | 0.037808 | 0.562579 |



| Exposure      | Outcome         | GWAS ID of exposure | GWAS ID of outcome | Sample size | SNP       | $\beta$  | se       | $p$      |
|---------------|-----------------|---------------------|--------------------|-------------|-----------|----------|----------|----------|
| Coffee intake | telomere length | ukb-b-5237          | ieu-b-4879         | 472174      | rs874573  | -0.02185 | 0.037824 | 0.563511 |
| Coffee intake | telomere length | ukb-b-5237          | ieu-b-4879         | 472174      | rs9296406 | -0.02174 | 0.037805 | 0.565182 |
| Coffee intake | telomere length | ukb-b-5237          | ieu-b-4879         | 472174      | rs9398171 | -0.02228 | 0.037928 | 0.556956 |
| Coffee intake | telomere length | ukb-b-5237          | ieu-b-4879         | 472174      | rs9650210 | -0.02148 | 0.037793 | 0.569831 |
| Coffee intake | telomere length | ukb-b-5237          | ieu-b-4879         | 472174      | rs9953004 | -0.02524 | 0.037821 | 0.504519 |
| Coffee intake | telomere length | ukb-b-5237          | ieu-b-4879         | 472174      | All       | -0.02365 | 0.037622 | 0.529649 |

**Supplementary Table S2.** The leave-one-out analysis of filtered coffee intake on telomere length using IVW approach.

| Exposure               | Outcome         | GWAS ID of exposure | GWAS ID of outcome | Sample size | SNP         | $\beta$  | se       | $p$      |
|------------------------|-----------------|---------------------|--------------------|-------------|-------------|----------|----------|----------|
| Filtered coffee intake | telomere length | ukb-b-748           | ieu-b-4879         | 472174      | rs10468280  | 0.000534 | 0.018157 | 0.976518 |
| Filtered coffee intake | telomere length | ukb-b-748           | ieu-b-4879         | 472174      | rs10875059  | -0.00534 | 0.019084 | 0.779793 |
| Filtered coffee intake | telomere length | ukb-b-748           | ieu-b-4879         | 472174      | rs10932789  | -0.00661 | 0.018948 | 0.727048 |
| Filtered coffee intake | telomere length | ukb-b-748           | ieu-b-4879         | 472174      | rs117372271 | -0.00919 | 0.018375 | 0.617125 |
| Filtered coffee intake | telomere length | ukb-b-748           | ieu-b-4879         | 472174      | rs1215980   | -0.00637 | 0.019009 | 0.737387 |
| Filtered coffee intake | telomere length | ukb-b-748           | ieu-b-4879         | 472174      | rs12535729  | -0.00588 | 0.019115 | 0.758545 |
| Filtered coffee intake | telomere length | ukb-b-748           | ieu-b-4879         | 472174      | rs144522705 | -0.01133 | 0.017587 | 0.519355 |
| Filtered coffee intake | telomere length | ukb-b-748           | ieu-b-4879         | 472174      | rs147912937 | -0.00668 | 0.01889  | 0.723726 |
| Filtered coffee intake | telomere length | ukb-b-748           | ieu-b-4879         | 472174      | rs16973000  | -0.01392 | 0.016517 | 0.399197 |
| Filtered coffee intake | telomere length | ukb-b-748           | ieu-b-4879         | 472174      | rs2470893   | 0.00598  | 0.017489 | 0.732404 |
| Filtered coffee intake | telomere length | ukb-b-748           | ieu-b-4879         | 472174      | rs2830854   | 0.000524 | 0.018333 | 0.977194 |
| Filtered coffee intake | telomere length | ukb-b-748           | ieu-b-4879         | 472174      | rs3004179   | -0.00695 | 0.01917  | 0.716973 |
| Filtered coffee intake | telomere length | ukb-b-748           | ieu-b-4879         | 472174      | rs4129316   | 0.000251 | 0.018053 | 0.988925 |
| Filtered coffee intake | telomere length | ukb-b-748           | ieu-b-4879         | 472174      | rs6968865   | -0.007   | 0.019494 | 0.719475 |

|                        |                 |           |            |        |            |          |          |          |
|------------------------|-----------------|-----------|------------|--------|------------|----------|----------|----------|
| Filtered coffee intake | telomere length | ukb-b-748 | ieu-b-4879 | 472174 | rs74852036 | -0.00341 | 0.018905 | 0.856649 |
| Filtered coffee intake | telomere length | ukb-b-748 | ieu-b-4879 | 472174 | rs7610922  | -0.00297 | 0.018865 | 0.875106 |
| Filtered coffee intake | telomere length | ukb-b-748 | ieu-b-4879 | 472174 | rs76653299 | -0.00547 | 0.019007 | 0.773388 |
| Filtered coffee intake | telomere length | ukb-b-748 | ieu-b-4879 | 472174 | rs7788498  | -0.00687 | 0.018897 | 0.716241 |
| Filtered coffee intake | telomere length | ukb-b-748 | ieu-b-4879 | 472174 | rs78169764 | -0.00215 | 0.018781 | 0.908925 |
| Filtered coffee intake | telomere length | ukb-b-748 | ieu-b-4879 | 472174 | rs80353807 | -0.0059  | 0.018994 | 0.756056 |
| Filtered coffee intake | telomere length | ukb-b-748 | ieu-b-4879 | 472174 | rs9791176  | -0.00623 | 0.018996 | 0.742992 |
| Filtered coffee intake | telomere length | ukb-b-748 | ieu-b-4879 | 472174 | All        | -0.00502 | 0.01817  | 0.782345 |

---

**Supplementary Table S3.** The leave-one-out analysis of instant coffee intake on telomere length using IVW approach.

| Exposure              | Outcome         | GWAS ID of exposure | GWAS ID of outcome | Sample size | SNP         | $\beta$  | se       | $p$      |
|-----------------------|-----------------|---------------------|--------------------|-------------|-------------|----------|----------|----------|
| Instant coffee intake | telomere length | ukb-b-930           | ieu-b-4879         | 472174      | rs112601576 | -0.02072 | 0.008541 | 0.015251 |
| Instant coffee intake | telomere length | ukb-b-930           | ieu-b-4879         | 472174      | rs11649454  | -0.01745 | 0.008543 | 0.041048 |
| Instant coffee intake | telomere length | ukb-b-930           | ieu-b-4879         | 472174      | rs117671135 | -0.01882 | 0.008605 | 0.02874  |
| Instant coffee intake | telomere length | ukb-b-930           | ieu-b-4879         | 472174      | rs117947931 | -0.01995 | 0.008617 | 0.020607 |
| Instant coffee intake | telomere length | ukb-b-930           | ieu-b-4879         | 472174      | rs12510185  | -0.021   | 0.008534 | 0.013855 |
| Instant coffee intake | telomere length | ukb-b-930           | ieu-b-4879         | 472174      | rs143523613 | -0.0204  | 0.008554 | 0.017072 |
| Instant coffee intake | telomere length | ukb-b-930           | ieu-b-4879         | 472174      | rs144845508 | -0.02183 | 0.008544 | 0.010616 |
| Instant coffee intake | telomere length | ukb-b-930           | ieu-b-4879         | 472174      | rs148251241 | -0.01811 | 0.008563 | 0.034405 |
| Instant coffee intake | telomere length | ukb-b-930           | ieu-b-4879         | 472174      | rs1537362   | -0.01999 | 0.008669 | 0.021133 |
| Instant coffee intake | telomere length | ukb-b-930           | ieu-b-4879         | 472174      | rs167978    | -0.02011 | 0.008595 | 0.019276 |
| Instant coffee intake | telomere length | ukb-b-930           | ieu-b-4879         | 472174      | rs2171275   | -0.02052 | 0.008555 | 0.016437 |
| Instant coffee intake | telomere length | ukb-b-930           | ieu-b-4879         | 472174      | rs2472297   | -0.01466 | 0.00865  | 0.090093 |
| Instant coffee intake | telomere length | ukb-b-930           | ieu-b-4879         | 472174      | rs2599415   | -0.02281 | 0.00854  | 0.007553 |
| Instant coffee intake | telomere length | ukb-b-930           | ieu-b-4879         | 472174      | rs2726351   | -0.01648 | 0.008577 | 0.054658 |

|                       |                 |           |            |        |            |          |          |          |
|-----------------------|-----------------|-----------|------------|--------|------------|----------|----------|----------|
| Instant coffee intake | telomere length | ukb-b-930 | ieu-b-4879 | 472174 | rs34667201 | -0.01884 | 0.008606 | 0.028623 |
| Instant coffee intake | telomere length | ukb-b-930 | ieu-b-4879 | 472174 | rs62418417 | -0.01767 | 0.008555 | 0.038857 |
| Instant coffee intake | telomere length | ukb-b-930 | ieu-b-4879 | 472174 | rs6968554  | -0.02321 | 0.008737 | 0.007887 |
| Instant coffee intake | telomere length | ukb-b-930 | ieu-b-4879 | 472174 | rs76197902 | -0.019   | 0.00862  | 0.027519 |
| Instant coffee intake | telomere length | ukb-b-930 | ieu-b-4879 | 472174 | rs78548721 | -0.02043 | 0.00859  | 0.017374 |
| Instant coffee intake | telomere length | ukb-b-930 | ieu-b-4879 | 472174 | rs80144686 | -0.01845 | 0.008553 | 0.030996 |
| Instant coffee intake | telomere length | ukb-b-930 | ieu-b-4879 | 472174 | All        | -0.01952 | 0.008345 | 0.019309 |

---
